# Supplementary material for: Zinc-coordinated polydopamine surface with a nanostructure and superhydrophilicity for antibiofouling and antibacterial applications
Source: Royal Society of Chemistry journal article supplement (doi:10.1039/d2ma00482h), 2022-01-01
Supplement: d2ma00482h1.pdf [file d2ma00482h1.pdf]

## Supporting Information

# Zinc-coordinated Polydopamine Surface with Nanostructure and Superhydrophilicity for Anti- biofouling and Antibacteria

*Po Wang,<sup>a</sup> Yi-Lin Zhang,<sup>a</sup> Kai-Lai Fu,<sup>a</sup> Zhuang Liu,<sup>a,c,\*</sup> Ling Zhang,<sup>b</sup> Chen Liu,<sup>b</sup> Yi Deng,<sup>a,c</sup> Rui Xie,<sup>a,c</sup> Xiao-Jie Ju,<sup>a,c</sup> Wei Wang,<sup>a,c</sup> and Liang-Yin Chu<sup>a,c</sup>,*

*<sup>a</sup>School of Chemical Engineering, Sichuan University, Chengdu, Sichuan 610065, P. R. China*

*<sup>b</sup>Kidney Research Institute, Division of Nephrology, West China Hospital of Sichuan University, Chengdu, Sichuan 610065, China*

*<sup>c</sup>State Key Laboratory of Polymer Materials Engineering, Sichuan University, Chengdu, Sichuan 610065, P. R. China*

*\*E-mail: liuz@scu.edu.cn (Z.L.)*

## Content

## Supplementary Figures S1-S6

## Supplementary Figures S1-S6

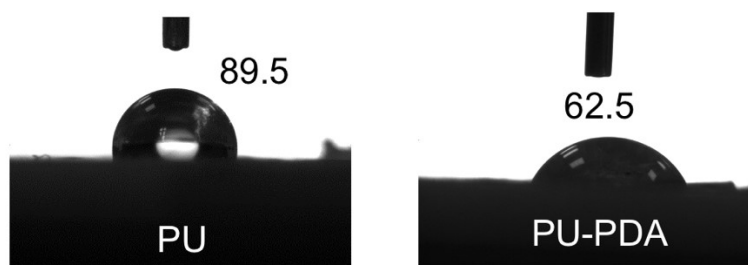

**Figure S1.** Water contact angle of PU and PU-PDA films

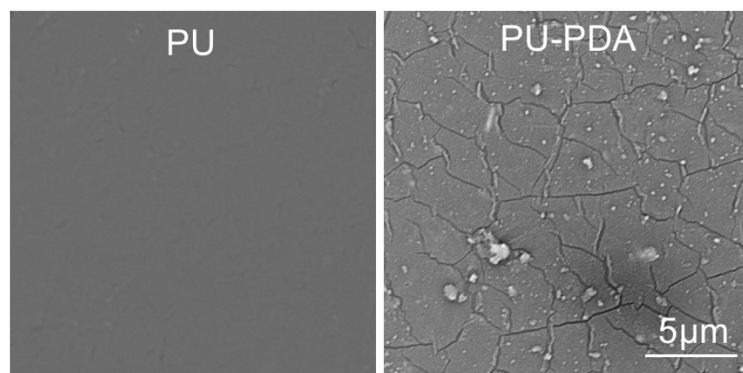

**Figure S2.** SEM images of PU and PU-PDA films

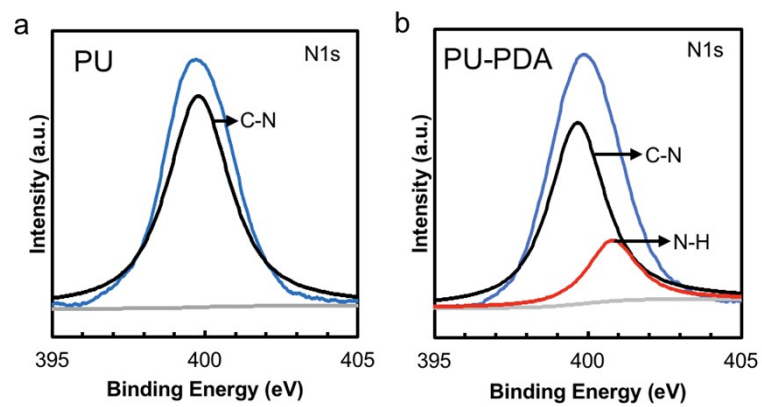

**Figure S3.** High-resolution XPS spectra of N1s of PU and PU-PDA films

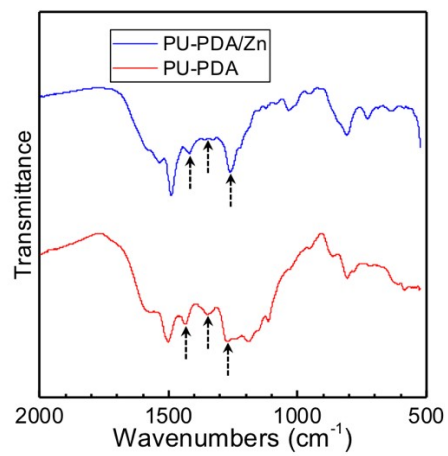

**Figure S4.** FT-IR Spectrum of PU-PDA and PU-PDA/Zn films

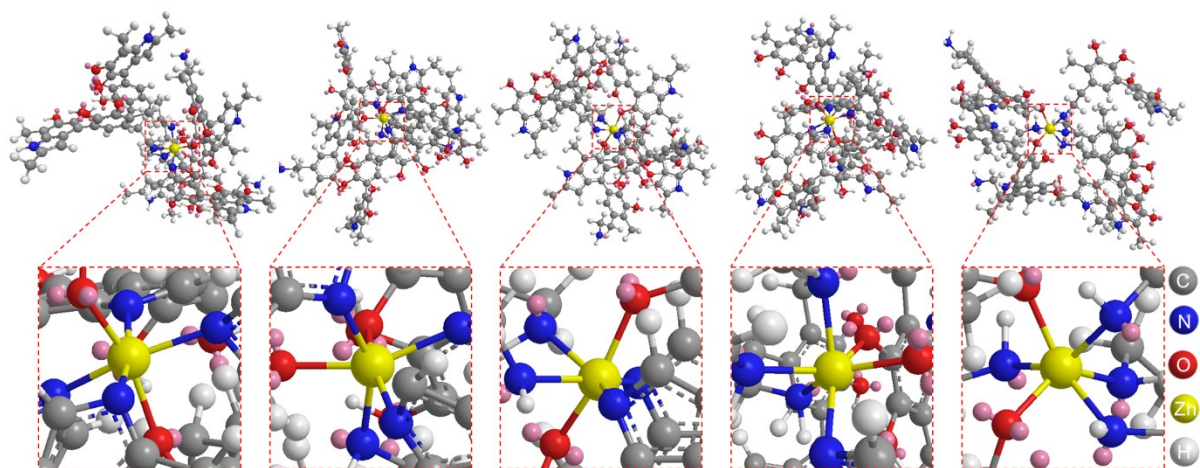

**Figure S5.** Several possible structures of  $\text{Zn}^{2+}$  bonding with polydopamine via Zn-N and Zn-O bonds.

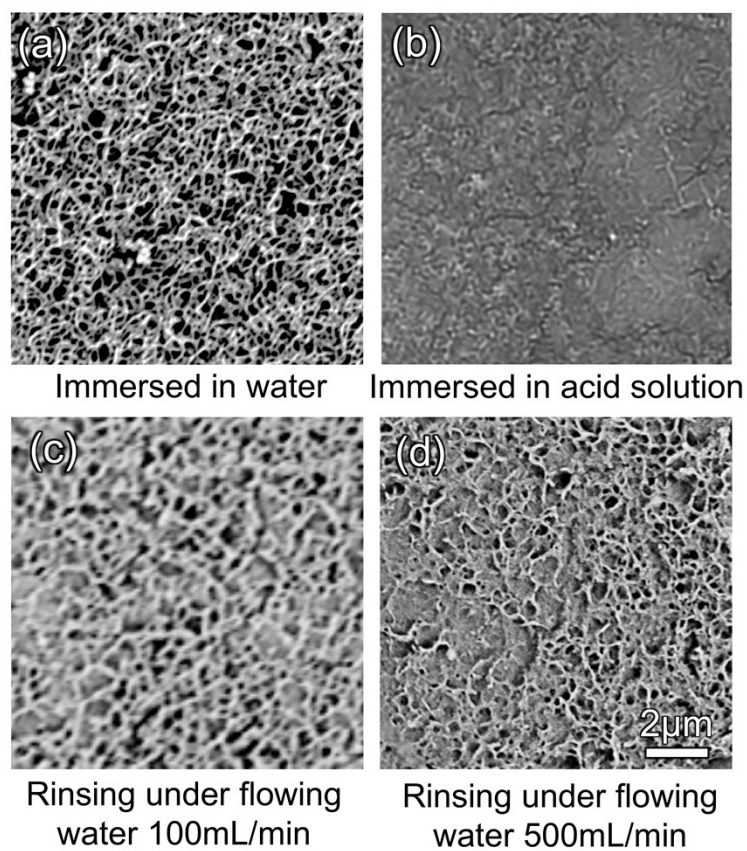

**Figure S6.** SEM images of PU-PDA/Zn-0.08 to show the stability. The rinsing experiments are taken place by fixing the PU-PDA/Zn-0.08 film in a tube with diameter of 8mm.

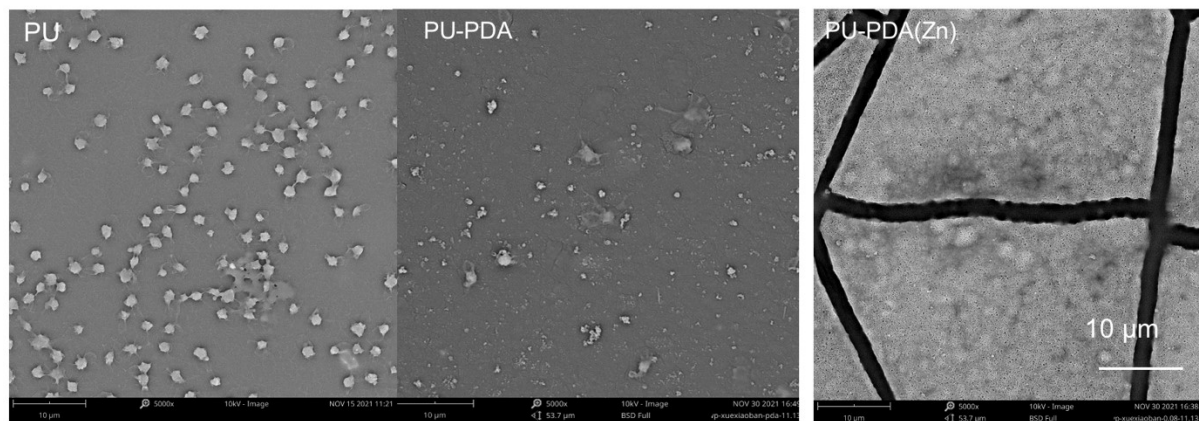

**Figure S7.** SEM images of the platelets adhered on PU (a), PU-PDA (b), PU-PDA/Zn-0.08

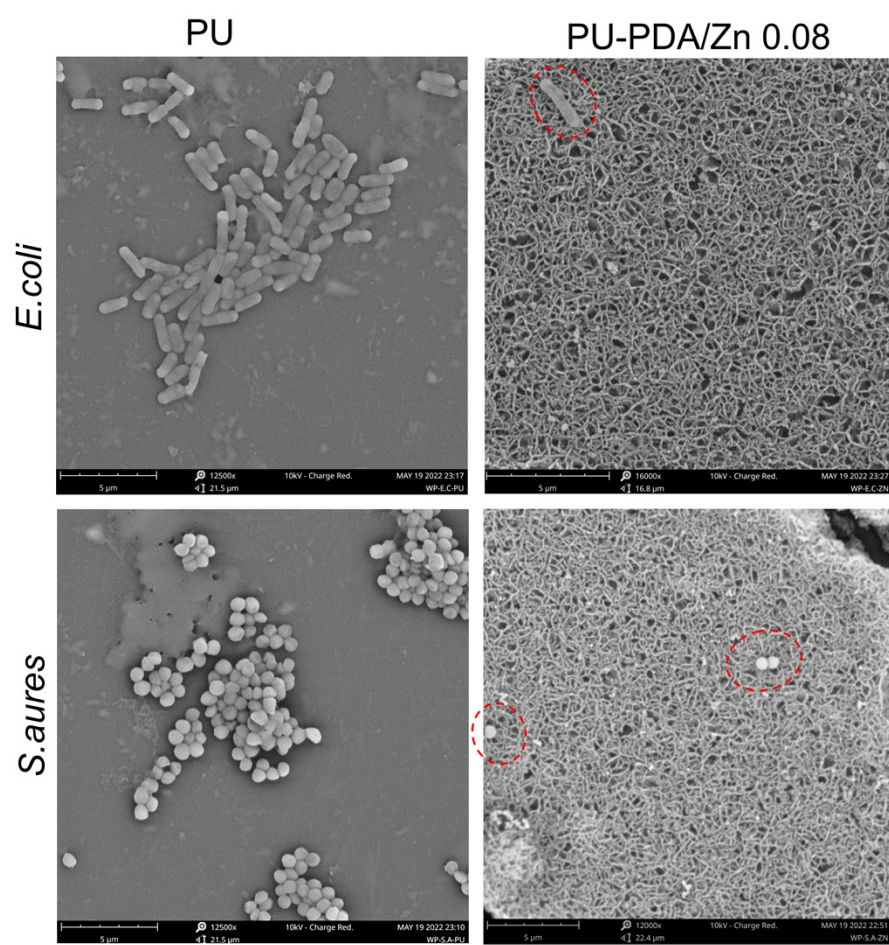

**Figure S8.** SEM images to show the antibacterial attachment on PU and PU-PDA/Zn-0.08
